# Supplementary material for: Designing a nickel(ii) thiourea-formaldehyde polymer/nanocarbon bifunctional molecular catalyst with superior ORR, OER activities and its application to Zn–air battery
Source: Royal Society of Chemistry journal article supplement (doi:10.1039/d2ma00450j), 2022-01-01
Supplement: d2ma00450j1.pdf [file d2ma00450j1.pdf]

## Supplementary Information

# Design and Fabrication of Nickel (II) Thiourea-formaldehyde Polymer/Nanocarbon Bifunctional Molecular Catalyst with Superior ORR, OER Activities and its Application to Zn-air Battery

Pandian Ganesan,<sup>a\*</sup> Aleksandar Staykov,<sup>a</sup> Albert Mufundirwa,<sup>b</sup> Takeharu Sugiyama,<sup>b</sup> Hiroaki Shu,<sup>c</sup> Mitsugu Uejima,<sup>c</sup> Naotoshi Nakashima<sup>a\*</sup>

<sup>a</sup> International Institute for Carbon-Neutral Energy Research (I2CNER), Kyushu University, 744, Motoooka, Nishi-ku, Fukuoka, 819-0395, Japan

<sup>b</sup> Research Center for Synchrotron Light Applications, Kyushu University, 6-1 Kasuga-koen, Kasuga, Fukuoka 816-8580, Japan

<sup>c</sup> Zeon Corporation, Chiyoda-ku, Tokyo, 100-8246, Japan

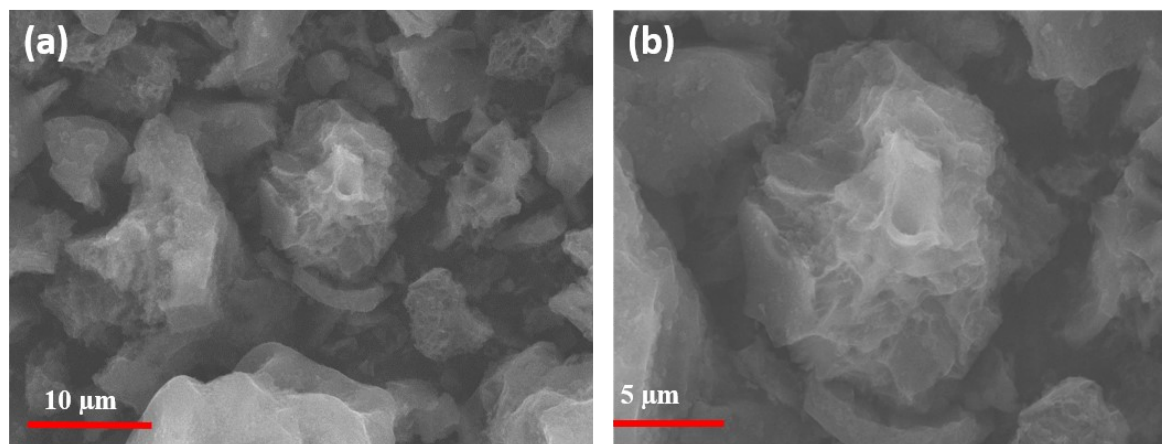

**Figure S1.** (a) Low and (b) high magnification SEM images of the CNovel carbon (MH-00).

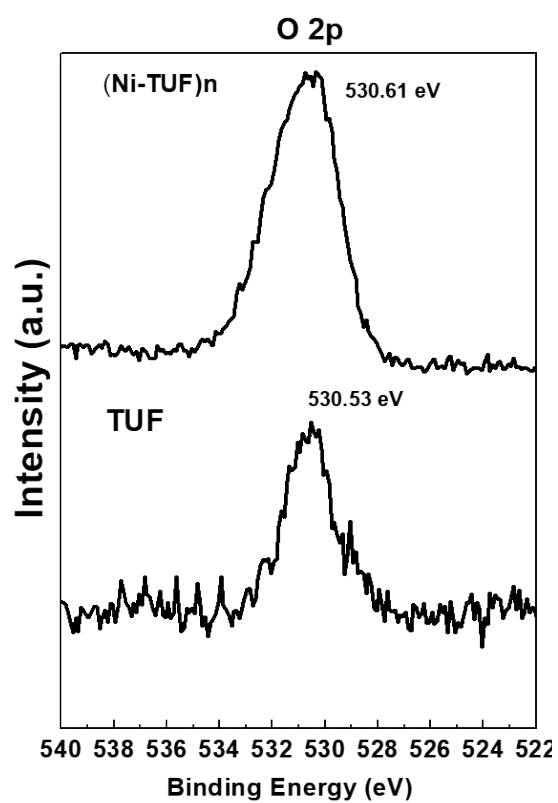

**Figure S2.** XPS of the (Ni-TUF)<sub>n</sub> and TUF in the O<sub>2</sub>p region.

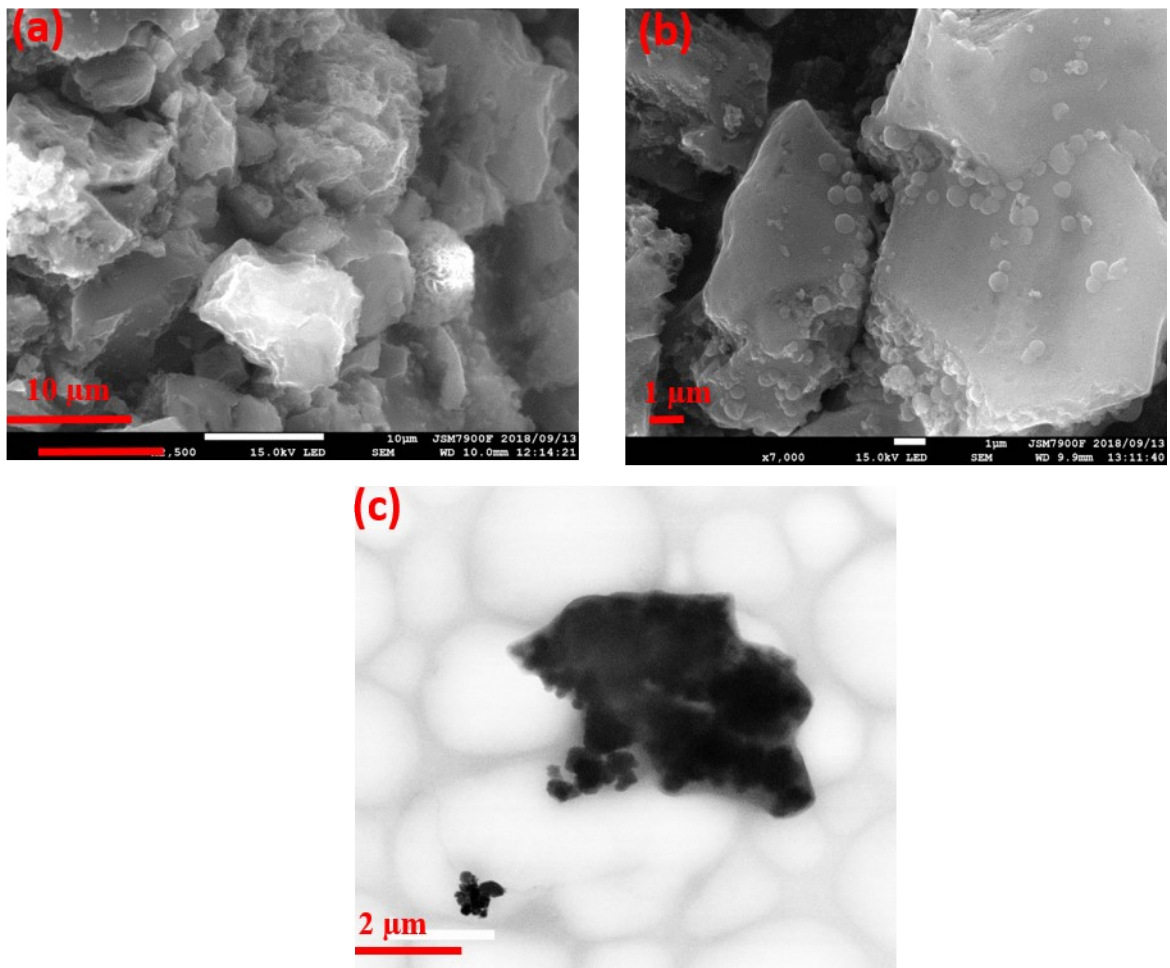

**Figure S3.** (a) Low and (b) high magnification SEM images of (Ni-TUF)<sub>n</sub>/CN:w/w-1/5. (c) TEM image of (Ni-TUF)<sub>n</sub>/CN:w/w-1/5.

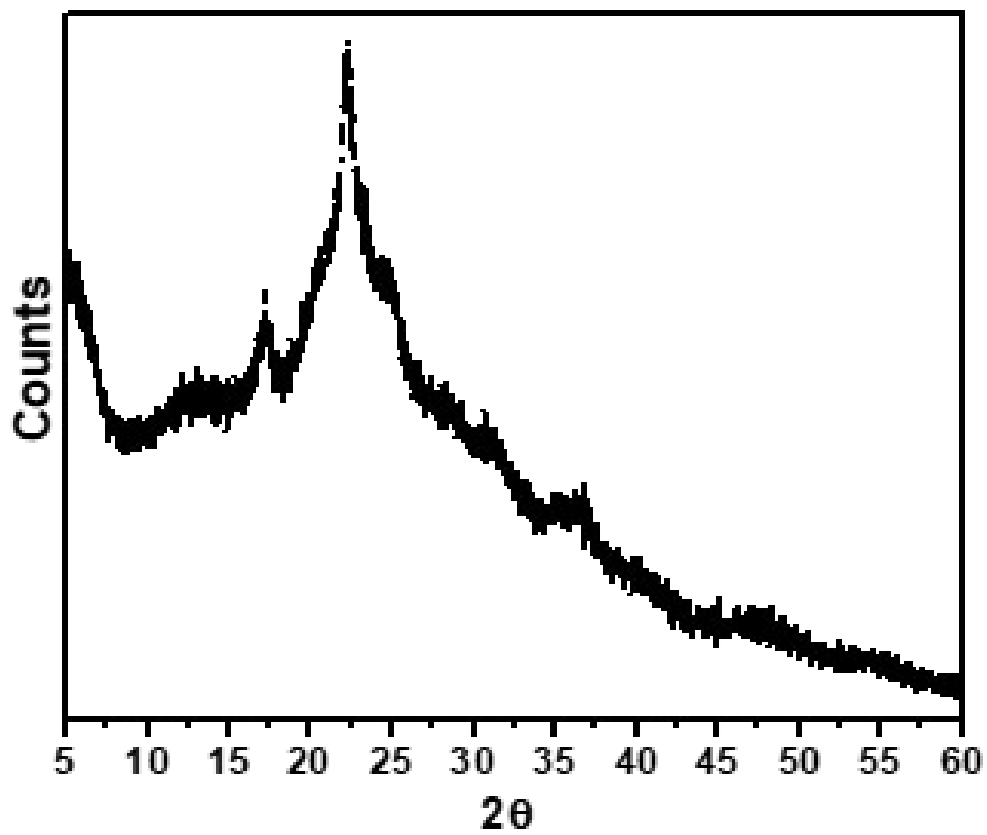

Figure S4. XRD diagram of the (Ni-TUF)<sub>n</sub>.

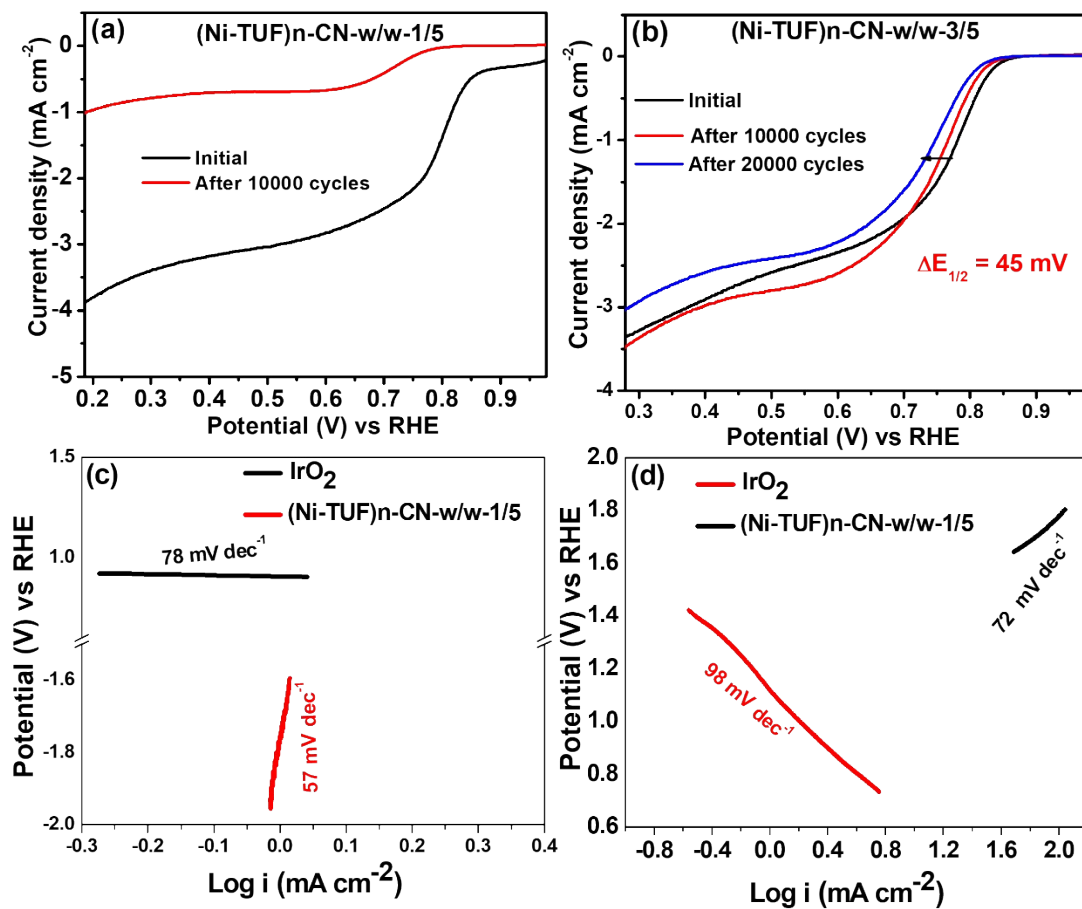

**Figure S5.** ORR accelerated durability tests for (Ni-TUF)n/CN:w/w-1/10 (a) and (Ni-TUF)n/CN:w/w-3/5 (b). (c) the ORR Tafel slope of (Ni-TUF)n/CN:w/w-3/5 and (d) the OER Tafel slope of (Ni-TUF)n/CN:w/w-3/5.

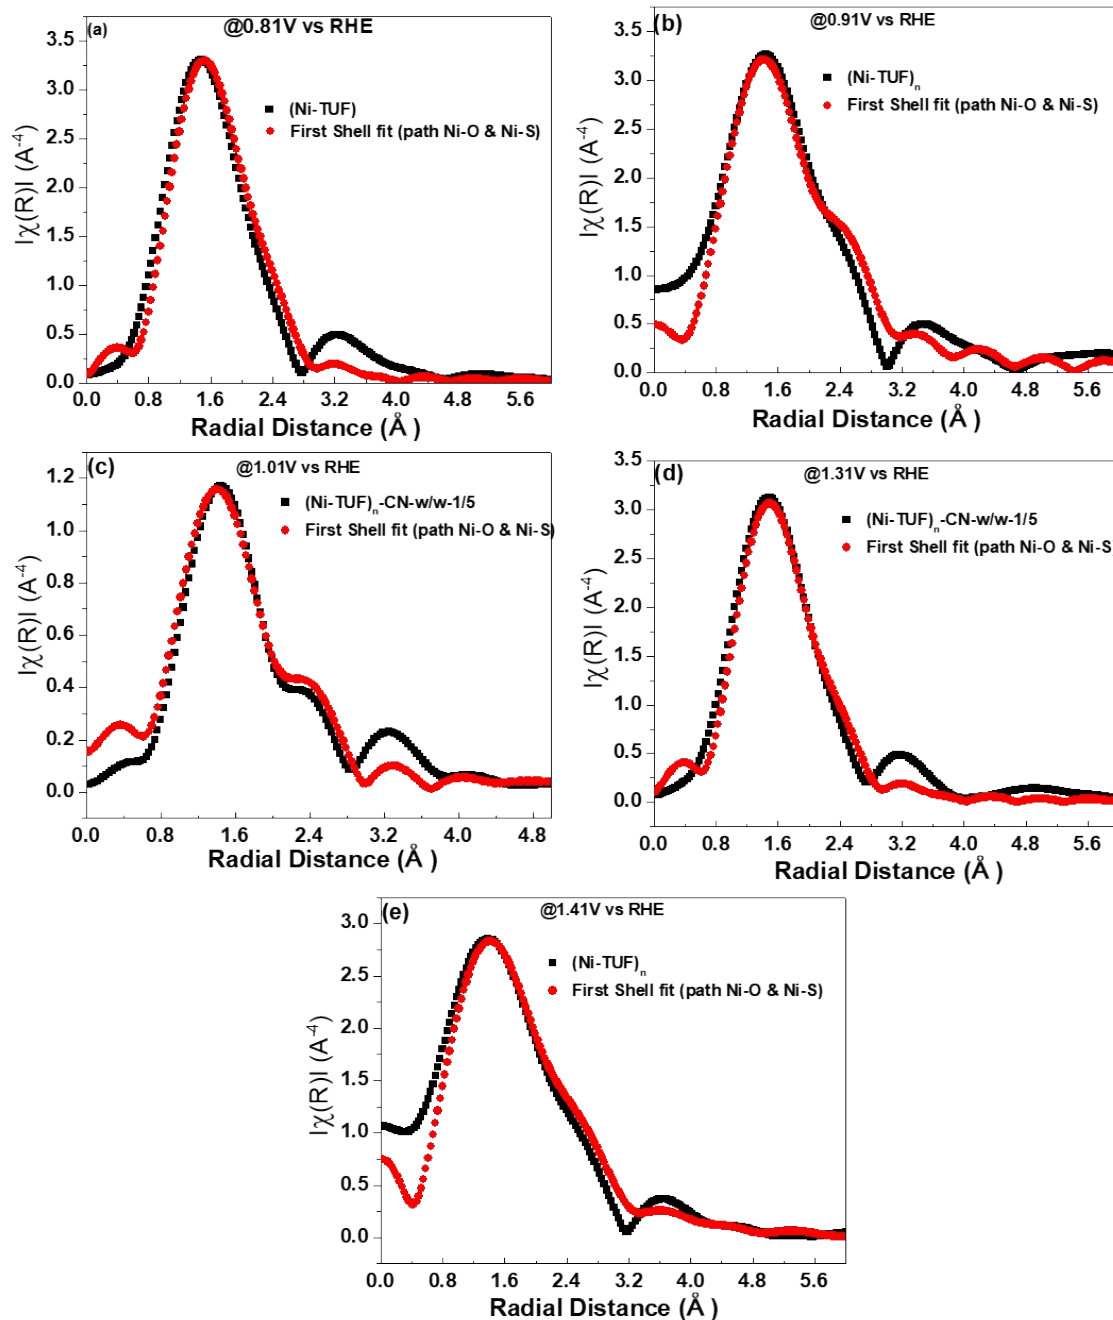

**Figure S6.** Electrochemical EXAFS diagrams (black) of the provided catalyst at potentials of (a) 0.81V, (b) 0.91V, (c) 1.01V, (d) 1.31V and (e) 1.41V vs. RHE and their first shell fitting curves (red) for path Ni-O and Ni-S.

**Table S1.** List of parameters used for the first shell fitting in the EXAFS of (Ni-TUF)<sub>n</sub>/CN-

| Voltages<br>V vs. RHE | R-window      | $S_0^2$ | Debye Waller<br>factor<br>$\sigma_j^2$ | $E_0$ | Coordination number |      |       |
|-----------------------|---------------|---------|----------------------------------------|-------|---------------------|------|-------|
|                       |               |         |                                        |       | Ni-O                | Ni-S | Total |
| <i>ex situ</i>        | Kaiser-Bessel | 9.95    | 0.072                                  | 2.88  | 2.0                 | 2.0  | 4     |
| 1.01                  | Kaiser-Bessel | 6.00    | 0.040                                  | 5.00  | 2.0                 | 2.0  | 4     |
| 0.81                  | Kaiser-Bessel | 4.55    | 0.321                                  | 4.80  | 2.0                 | 2.0  | 4     |
| 0.91                  | Kaiser-Bessel | 3.60    | 0.017                                  | 5.20  | 2.0                 | 2.0  | 4     |
| 1.31                  | Parzen        | 4.30    | 0.020                                  | 4.20  | 2.0                 | 2.0  | 4     |
| 1.41                  | Parzen        | 3.80    | 0.014                                  | 4.50  | 2.0                 | 2.0  | 4     |

w/w:1/5.

**Table S2.** List of parameters used for the first shell fitting in the EXAFS of (Ni-TUF)<sub>n</sub>.

| Voltages<br>V vs RHE | R-window | $S_0^2$ | Debye Waller<br>factor<br>$\sigma_j^2$ | $E_0$ | Co-ordination number |      |       |
|----------------------|----------|---------|----------------------------------------|-------|----------------------|------|-------|
|                      |          |         |                                        |       | Ni-O                 | Ni-S | Total |
| <i>ex situ</i>       | Sine     | 3.66    | 0.025                                  | 0.00  | 2.0                  | 2.0  | 4     |
| 1.01                 | Parzen   | 3.00    | 0.018                                  | 4.17  | 2.0                  | 2.0  | 4     |
| 0.81                 | Welch    | 3.00    | 0.045                                  | 4.23  | 2.0                  | 2.0  | 4     |
| 0.91                 | Welch    | 3.00    | 0.005                                  | 4.23  | 2.0                  | 2.0  | 4     |
| 1.31                 | Sine     | 4.00    | 0.030                                  | 3.80  | 2.0                  | 2.0  | 4     |
| 1.41                 | Hanning  | 3.00    | 0.024                                  | 4.20  | 2.0                  | 2.0  | 4     |
